# Supplementary material
Source: Springer Nature journal article supplement (https://www.springermedizin.de/resource/supplementary/12913_2013_2903_MOESM1_ESM.pdf/9531830)

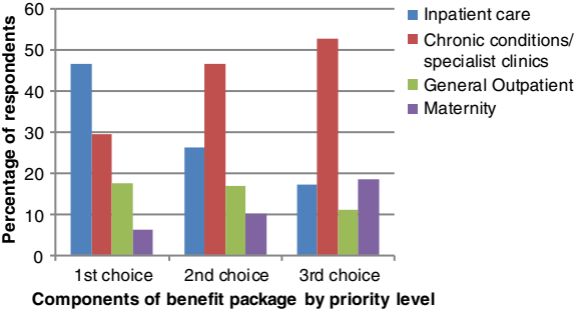

Supplement: MOESM1 [file 9531830]
